# Supplementary material
Source: PubMed Central journal article supplement (PMC5420199)

Wild-type

*Kif3a<sup>fl/fl</sup>; MyoDi-Cre*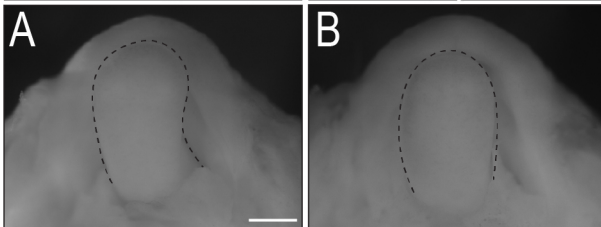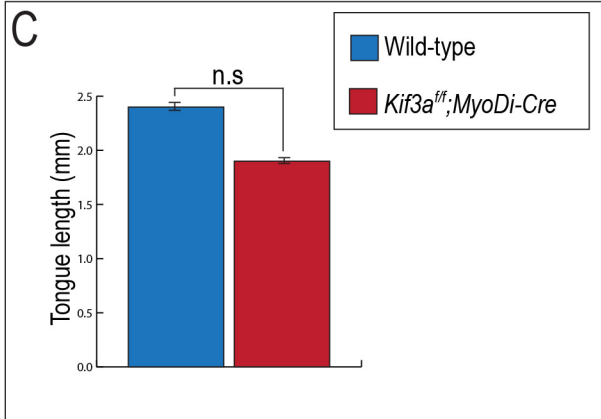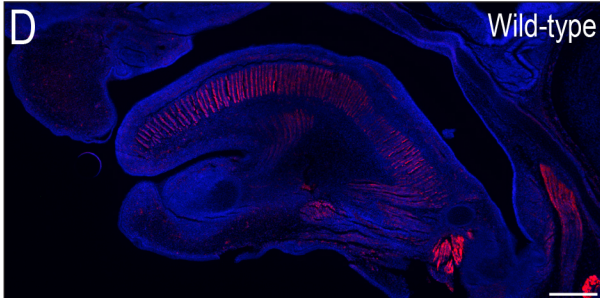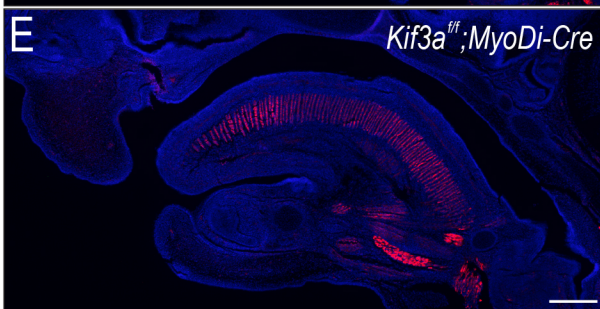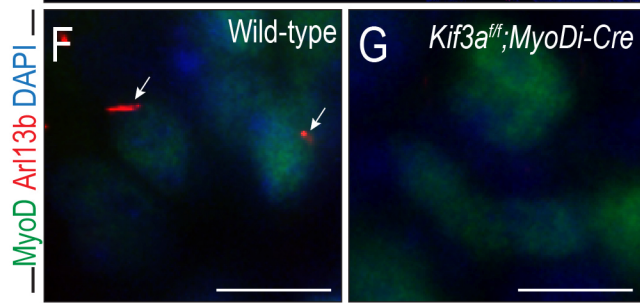

Supplement: NIHMS861364-supplement-1.pdf [file NIHMS861364-supplement-1.pdf]

Fig. S2

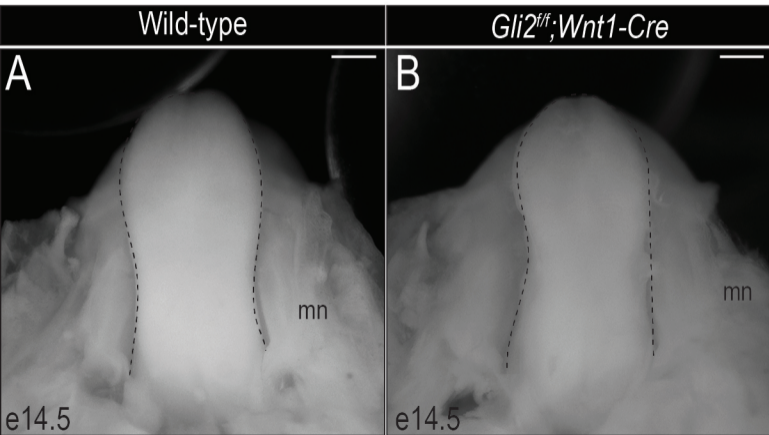

Supplement: NIHMS861364-supplement-2.pdf [file NIHMS861364-supplement-2.pdf]
